# Supplementary material for: Is a Lower Dose of Rivaroxaban Required for Asians? A Systematic Review of a Population Pharmacokinetics and Pharmacodynamics Analysis of Rivaroxaban
Source: Pharmaceutics. 2023 Feb 9;15(2):588. doi: 10.3390/pharmaceutics15020588 (PMC9964148; doi:10.3390/pharmaceutics15020588)
Supplement: Supplementary file 1 [file pharmaceutics-15-00588-s001.zip]

Archive with 4 entries (4 files):
- supplementary Figures.pdf
- supplementary Table S1.xlsx
- supplementary Table S2.pdf
- supplementary Table S3.pdf
