# Supplementary material for: Is a Lower Dose of Rivaroxaban Required for Asians? A Systematic Review of a Population Pharmacokinetics and Pharmacodynamics Analysis of Rivaroxaban
Source: Pharmaceutics. 2023 Feb 9;15(2):588. doi: 10.3390/pharmaceutics15020588 (PMC9964148; doi:10.3390/pharmaceutics15020588)
Supplement: Supplementary file 1 [file pharmaceutics-15-00588-s001.zip › supplementary Table S1.xlsx]

## Sheet: Sheet1
Table S1. Checklist for literature quality when reporting a clinical pharmacokinetic study
		Item	Mueck et al. (2007)	Mueck et al. (2008a)	Mueck et al. (2008b)	Mueck et al. (2011)	Xu et al. (2012)	Tanigawa et al. (2013)	Kaneko et al. (2013)	Girgis et al. (2014)	Zhang et al. (2017)	Barsam et al. (2017)	Suzuki et al. (2018)	Willmann et al. (2018a)	Willmann et al. (2018b)	Zdovc et al. (2019)	Goto et al. (2020)	Speed et al. (2020)	Willmann et al. (2021)	Esmaeili et al. (2022)	Liu et al. (2022)	Singkham et al. (2022)	Willmann et al. (2022)	Zhang et al. (2022)	Zhao et al. (2022)	Zhang et al. (2023)
Title/Abstract	1	Drug and patient population	1	1	1	1	1	1	1	1	1	1	1	1	1	1	1	1	1	1	1	1	1	1	1	1
	2	The name of the drug(s) studied, the route of administration, the population in whom it was studied, and the results of the primary objective and major clinical pharmacokinetic findings	1	1	1	1	1	1	1	1	1	1	1	1	1	1	1	1	1	1	1	1	1	1	1	1
Background	3	Pharmacokinetic data	1	0	0	1	0	1	0	1	1	0	0	1	0	1	0	0	0	1	1	0	0	1	0	1
	4	An explanation of the study rationale	1	1	1	1	1	1	1	1	1	1	1	1	1	1	1	1	1	1	1	1	1	1	1	1
	5	Specific objectives or hypotheses	1	1	1	1	1	1	1	1	1	1	1	1	1	1	1	1	1	1	1	1	1	1	1	1
Method	6	Eligibility criteria of study participants	1	1	1	1	0	1	0	1	1	1	1	1	1	0	1	1	0	1	1	1	0	1	1	1
	7	Co-administration with other potentially interacting drugs or food	1	1	1	0	0	0	0	1	1	0	1	0	1	1	1	0	0	1	1	0	0	1	1	1
	8	Drug preparation and administration characteristics including dose, route, formulation, infusion duration (if applicable) and frequency	1	1	1	1	1	1	1	1	1	1	1	1	1	1	1	1	1	1	1	1	0	1	1	1
	9	Body fluid or tissue sampling (timing, frequency and storage) for quantitative drug measurement	1	1	1	1	1	1	1	1	1	0	1	0	1	1	1	0	1	1	1	1	0	1	1	1
	10	Quantitative bioanalytical methods	1	1	0	0	1	1	1	1	0	1	1	1	1	1	1	1	0	1	1	1	0	1	1	1
	11	Methods for handling missing data	0	0	0	0	0	0	1	0	0	0	0	0	0	0	0	0	1	0	0	0	0	0	0	0
	12	Modelling software	1	1	1	1	1	1	1	1	1	1	1	1	1	1	1	1	1	1	1	1	0	1	1	1
	13	Statistical methods and software	1	1	1	1	0	1	1	1	1	1	0	1	1	1	1	1	1	1	1	1	0	1	1	1
	14	Candidate strutural models	1	0	1	1	1	1	1	1	1	1	1	1	1	1	1	1	1	1	1	0	0	1	1	1
	15	Residual error struture	0	1	1	1	1	1	0	0	1	0	1	0	0	1	0	0	0	1	1	1	0	1	1	1
	16	Methods for base model determination	0	1	1	1	1	1	1	1	1	1	1	1	1	1	1	1	1	1	1	1	1	1	1	1
	17	Methods for base model evaluation	1	1	1	1	1	1	1	1	1	1	1	1	0	1	1	1	0	1	1	1	0	1	1	1
	18	Covariates analysis atrategy	1	1	1	1	1	1	1	1	1	1	1	1	0	1	0	1	1	1	1	1	1	1	1	1
	19	Methods for final model evaluation	1	1	1	1	1	1	1	1	1	1	1	1	1	1	1	1	1	1	1	1	1	1	1	1
	20	Distribution of individual model parameters	0	0	1	0	1	0	0	0	0	0	1	1	0	0	0	1	0	1	0	1	0	0	1	1
	21	Estimation methods	1	1	1	1	1	1	1	1	1	0	1	1	1	1	1	1	0	1	1	1	0	0	1	1
Results	22	Population characteristics	1	1	1	1	1	1	1	1	1	1	1	1	1	1	1	1	1	1	1	1	1	1	1	1
	23	Schematic of the final model	1	0	0	0	0	1	0	0	0	0	0	1	0	0	0	0	0	0	0	0	0	0	1	0
	24	Number of subjects and observations	1	1	1	1	0	1	1	1	0	1	1	1	1	1	1	1	1	1	1	1	0	1	1	1
	25	Table of the final model parameter	1	1	1	1	1	1	1	1	1	1	1	1	1	1	1	1	1	1	1	1	1	1	1	1
	26	Final model evaluation plots	1	0	0	1	1	1	1	1	1	1	1	1	1	1	1	1	1	1	1	1	1	1	1	1
	27	Summary of the model-building process and the derived final model	1	1	1	1	1	1	1	1	1	1	1	1	1	1	0	1	1	1	1	1	1	1	1	1
	28	Plot of concentration versus times and/or effect versus concentration	1	1	1	1	1	1	1	1	1	1	1	1	1	1	1	1	1	0	1	1	1	1	1	1
Discussion	29	Study limitation	1	1	0	0	0	0	1	1	1	1	1	1	1	1	1	1	0	0	1	1	0	1	1	0
	30	Study findings	1	1	1	1	1	1	1	1	1	1	1	1	1	1	1	1	1	1	1	1	1	1	1	1
Total score			26	24	24	24	22	26	24	26	25	22	26	26	23	26	23	24	20	26	27	25	13	26	28	27
Compliance			0.866667	0.8	0.8	0.8	0.733333	0.866667	0.8	0.866667	0.833333	0.733333	0.866667	0.866667	0.766667	0.866667	0.766667	0.8	0.666667	0.866667	0.9	0.833333	0.433333	0.866667	0.933333	0.9
