# Supplementary material for: Is a Lower Dose of Rivaroxaban Required for Asians? A Systematic Review of a Population Pharmacokinetics and Pharmacodynamics Analysis of Rivaroxaban
Source: Pharmaceutics. 2023 Feb 9;15(2):588. doi: 10.3390/pharmaceutics15020588 (PMC9964148; doi:10.3390/pharmaceutics15020588)
Supplement: Supplementary file 1 [file pharmaceutics-15-00588-s001.zip › supplementary Table S2.pdf]

### Table S2 Final population pharmacodynamic parameters of the included studies

[illegible]

|                            |                       |                                                                                 |                                                   |                                                                       |                     |       |
|----------------------------|-----------------------|---------------------------------------------------------------------------------|---------------------------------------------------|-----------------------------------------------------------------------|---------------------|-------|
| Girgis et al.<br>(2014)[6] | Pefakit®<br>PiCT® kit | PiCT= PiCT <sub>0</sub> +slope×C <sub>p</sub> <sup>1-Hill</sup> ×C <sub>p</sub> | PiCT <sub>0</sub> (s)<br>slope (s/(μg/L))<br>Hill | 7.97×[1-0.0016×(CrCl-76)]<br>0.0954<br>0.000263×[1+0.00293×(CrCl-76)] | 46.2%<br>5.56%<br>/ | 22.1% |
|----------------------------|-----------------------|---------------------------------------------------------------------------------|---------------------------------------------------|-----------------------------------------------------------------------|---------------------|-------|

Abbreviations: ALB: albumin; aPTT: activated partial thromboplastin time; aPTT<sub>0</sub>: baseline of aPTT; C<sub>p</sub>: rivaroxaban plasma concentration; CrCl: creatinine clearance; EC<sub>50</sub>: concentration generating 50% of the maximum effect; E<sub>max</sub>: the maximum effect; PiCT: prothrombinase-induced clotting time; PiCT<sub>0</sub>: baseline of PiCT; TBIL: total bilirubin.

# Fixed to estimates from model of healthy volunteers.

### Reference:

1. Mueck, W.; Becka, M.; Kubitza, D.; Voith, B.; Zuehlendorf, M. Population model of the pharmacokinetics and pharmacodynamics of rivaroxaban - An oral, direct Factor Xa inhibitor - In healthy subjects. *Int. J. Clin. Pharmacol. Ther.* **2007**, *45*, 335-344.
2. Tanigawa, T.; Kaneko, M.; Hashizume, K.; Kajikawa, M.; Ueda, H.; Tajiri, M.; Paolini, J. F.; Mueck, W. Model-based dose selection for phase III rivaroxaban study in Japanese patients with non-valvular atrial fibrillation. *Drug Metab. Pharmacokinet.* **2013**, *28*, 59-70.
3. Zdovc, J.; Petre, M.; Pišlar, M.; Repnik, K.; Mrhar, A.; Vogrin, M.; Potočnik, U.; Grabnar, I. Downregulation of ABCB1 gene in patients with total hip or knee arthroplasty influences pharmacokinetics of rivaroxaban: a population pharmacokinetic-pharmacodynamic study. *Eur. J. Clin. Pharmacol.* **2019**, *75*, 817-824.
4. Esmaeili, T.; Rezaee, M.; Abdar Esfahani, M.; Davoudian, A.; Omidfar, D.; Rezaee, S. Rivaroxaban population pharmacokinetic and pharmacodynamic modeling in Iranian patients. *J. Clin. Pharm. Ther.* **2022**, *47*, 1284-1292.
5. Zhao, N.; Liu, Z.; Xie, Q.; Wang, Z.; Sun, Z.; Xiang, Q.; Cui, Y. A Combined Pharmacometrics Analysis of Biomarker Distribution Under Treatment With Standard- or Low-Dose Rivaroxaban in Real-World Chinese Patients With Nonvalvular Atrial Fibrillation. *Front. Pharmacol.* **2022**, *13*, 814724.
6. Girgis, I. G.; Patel, M. R.; Peters, G. R.; Moore, K. T.; Mahaffey, K. W.; Nessel, C. C.; Halperin, J. L.; Califf, R. M.; Fox, K. A.; Becker, R. C. Population pharmacokinetics and pharmacodynamics of rivaroxaban in patients with non-valvular atrial fibrillation: results from ROCKET AF. *J. Clin. Pharmacol.* **2014**, *54*, 917-27.
