# Supplementary material for: Is a Lower Dose of Rivaroxaban Required for Asians? A Systematic Review of a Population Pharmacokinetics and Pharmacodynamics Analysis of Rivaroxaban
Source: Pharmaceutics. 2023 Feb 9;15(2):588. doi: 10.3390/pharmaceutics15020588 (PMC9964148; doi:10.3390/pharmaceutics15020588)
Supplement: Supplementary file 1 [file pharmaceutics-15-00588-s001.zip › supplementary Table S3.pdf]

**Table S3 Demographic information of simulated patients**

|                                                                 | median | min | max |
|-----------------------------------------------------------------|--------|-----|-----|
| Adults                                                          |        |     |     |
| Age (years)                                                     | 60     | 30  | 80  |
| Body weight (kg)                                                | 70     | 40  | 100 |
| Lean body weight (kg)                                           | 50     | 30  | 70  |
| Body surface area (m <sup>2</sup> )                             | 1.7    | 1.4 | 2.0 |
| Body mass index (kg/m <sup>2</sup> )                            | 24     | 18  | 30  |
| Gender                                                          | Male   |     |     |
| Serum creatinine (mg/dL)                                        | 1      | 0.3 | 2   |
| Creatinine clearance (mL/min)                                   | 80     | 15  | 120 |
| Creatinine clearance calculated using lean body weight (mL/min) | 60     | 10  | 90  |
| Estimated glomerular filtration rate (mL/min)                   | 80     | 15  | 120 |
| Blood urea nitrogen (mg/dL)                                     | 16     | 10  | 40  |
| Hematocrit (%)                                                  | 40     | 30  | 50  |
| Albumin (g/dL)                                                  | 4      | 2   | 6   |
| Hemoglobin (g/dL)                                               | 14     | 8   | 20  |
| Alanine aminotransferase (U/L)                                  | 22     | 5   | 40  |
| Total bilirubin (μmol/L)                                        | 14     | 5   | 50  |
| transformed Child-Turcotte-Pugh Score                           | 5.7    | 5   | 8   |
| Total cholesterol (mmol/L)                                      | 4      | 2   | 8   |
| ABC expression                                                  | 1.25   | 0.2 | 1.6 |
| <i>ABCB1</i> rs4728709                                          | GG     |     |     |
| <i>ABCB1</i> rs1045642                                          | TT     |     |     |
| CYP3A4 inhibitor/CYP3A4 inducers/P-gp inhibitors                | No     |     |     |
| Children                                                        |        |     |     |
| Body weight (kg)                                                | 30     | 10  | 50  |
| Formula                                                         | Tablet |     |     |
